# Supplementary material for: Alisol B 23-acetate activates ABCG5/G8 in the jejunum via the LXRα/ACAT2 pathway to relieve atherosclerosis in ovariectomized ApoE-/- mice
Source: PubMed Central journal article supplement (PMC7803561; doi:10.18632/aging.104185), 2020-11-25
Supplement: aging-12-104185-s001.pdf [file aging-12-104185-s001.pdf]

## SUPPLEMENTARY FIGURES

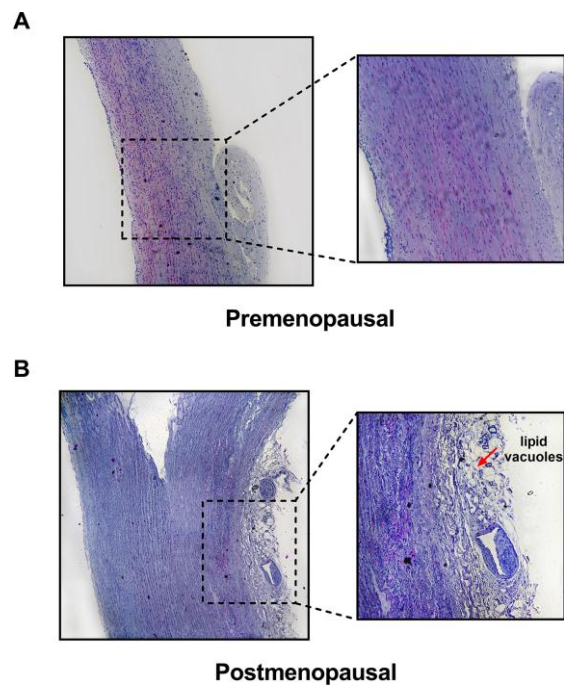

**Supplementary Figure 1. Postmenopausal women's ascending aorta lipid deposits increased significantly. (A, B)** Representative histological images of HE staining in ascending aorta in premenopausal women and postmenopausal women. Red arrow, lipid vacuoles. The original magnifications of the images in the same group are 4× (left) and 10× (right).

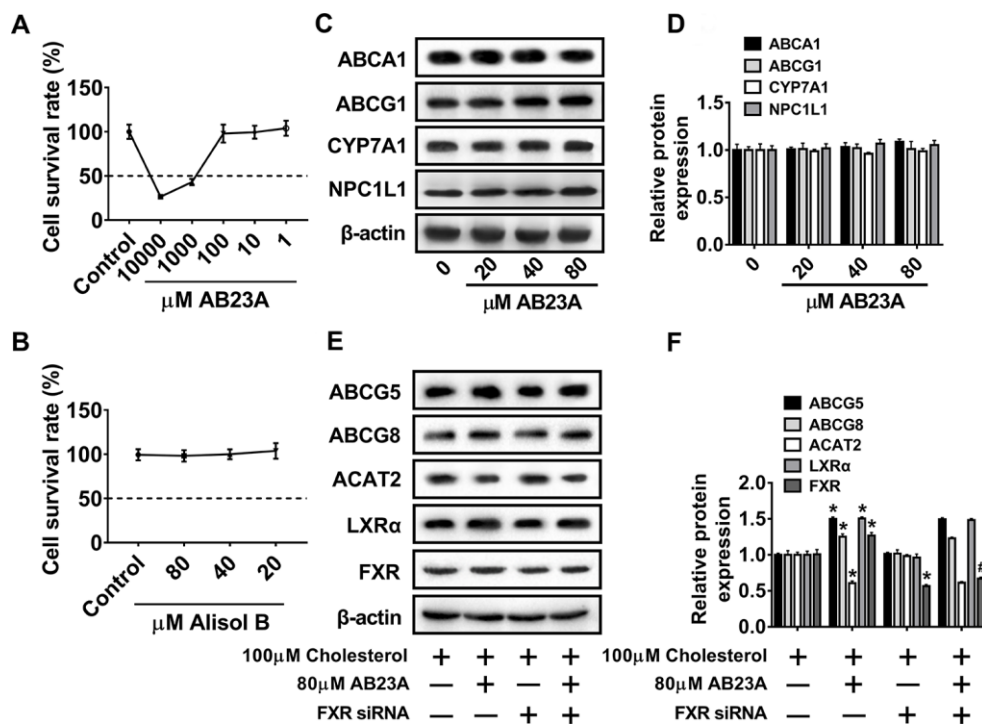

**Supplementary Figure 2. Caco-2 cells were used to explore the dosage of AB23A and its effect on the expression of proteins related to lipid metabolism.** (A) Caco-2 cells were exposed to different concentrations of AB23A (0, 10, 100, 1000, or 10000 μM) for 24 h. The MTT assay was used to detect cell viability. (B) Caco-2 cells were exposed to different concentrations of AB23A (0, 20, 40, or 80 μM) for 24 h. Then, the MTT assay was used to detect cell viability. (C, D) Caco-2 cells cultured under high-fat conditions were exposed to different concentrations of AB23A (0, 20, 40, or 80 μM) for 24 h. The protein expressions of ABCA1, ABCG1, CYP7A1 and NPC1L1 in Caco-2 cells from different groups (n=3/group). (E, F) Caco-2 cells were pretreated with FXR siRNA, Western blot analysis is performed to evaluate the protein levels of ABCG5, ABCG8, ACAT2, LXRα and FXR from different groups (n=3/group). The data are expressed as the mean ± SEM, and the results were obtained from three independent experiments. \*P < 0.05 compared to the control group; #P < 0.05 vs the AB23A only group.

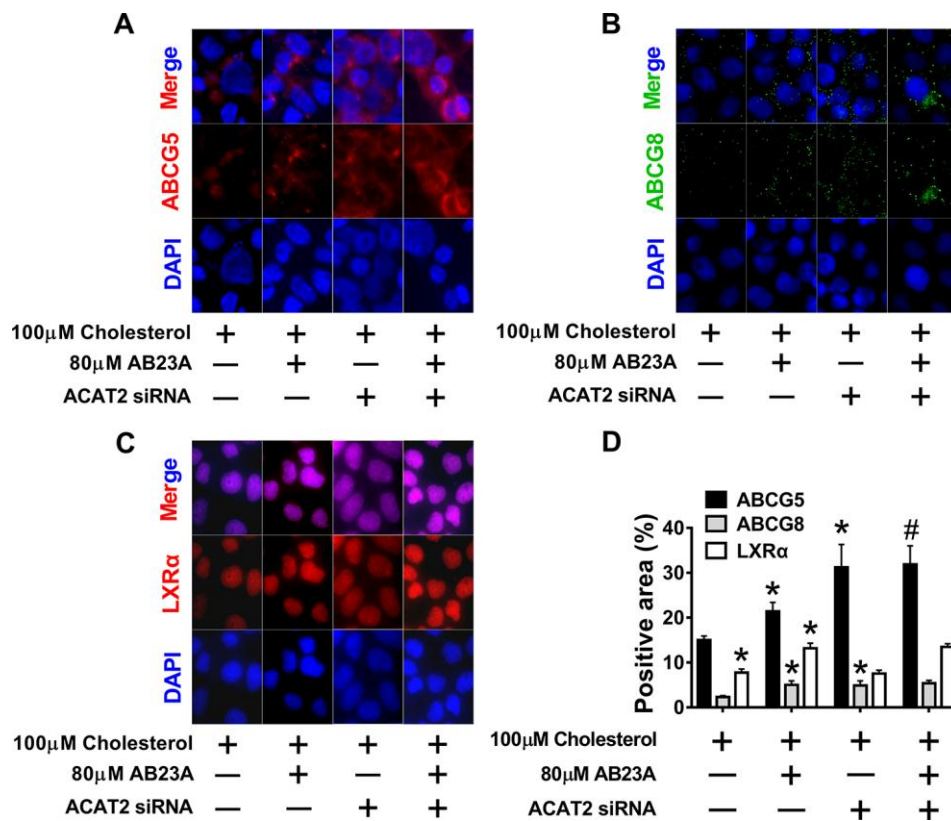

**Supplementary Figure 3. The regulation of ABCG5/G8 by AB23A depends on the participation of ACAT2.** Caco-2 cells were pre-treated with ACAT2 siRNA, (A–D) Immunofluorescence were performed to evaluate the protein levels of different groups ABCG5, ABCG8 and LXR $\alpha$  (n=3/group). The data are expressed as the mean  $\pm$  SEM, and the results were obtained from three independent experiments. \*P <0.05 compared to the control group; #P <0.05 vs the AB23A only group.

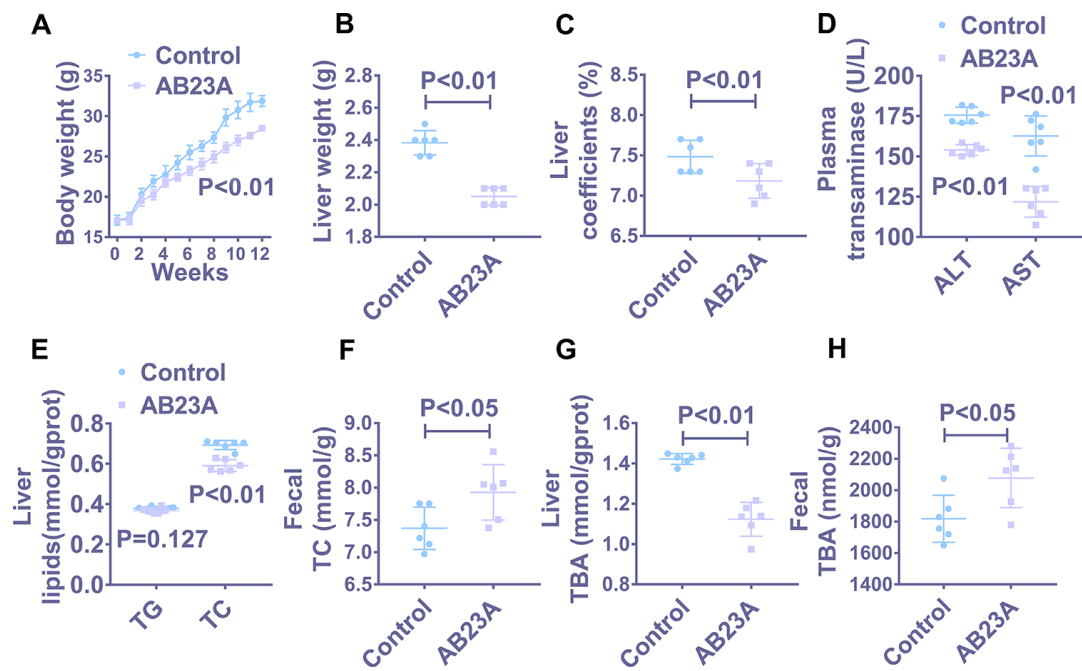

**Supplementary Figure 4. AB23A treatment improved the overall parameters of ovariectomized ApoE<sup>-/-</sup> mice and other biochemical indicators.** 8-week-old female ApoE<sup>-/-</sup> mice were removed from the ovary and given a high-fat diet with saline or AB23A (2.55 mg/kg) daily for 12 weeks. (A–C) Body weights, liver weights and liver coefficients of mice in different groups. (D) Transaminases levels detected in plasma of different groups of mice. (E) Kits were used to measure the levels of total triglyceride (TG) and total cholesterol (TC) levels in the livers of mice in different groups. (F) Kits were used to measure the levels of total cholesterol (TC) levels in feces of mice in different groups. (G, H) Kits were used to measure the levels of total bile acids (TBA) in the livers and feces of mice in different groups. The data are expressed as the mean  $\pm$  SEM, and the results were obtained from three independent experiments. \* $P < 0.05$  compared to the control group.

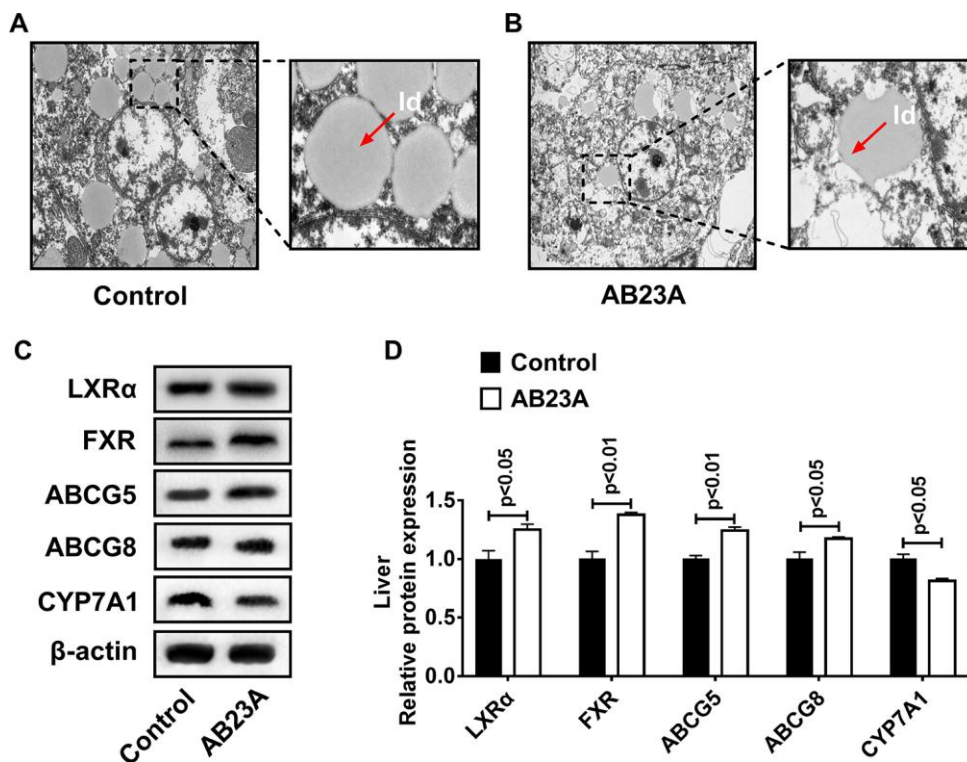

**Supplementary Figure 5. AB23A activates FXR in the liver of ovariectomized ApoE<sup>-/-</sup> mice and reduces lipid accumulation in the liver.** 8-week-old female ApoE<sup>-/-</sup> mice were removed from the ovary and given a high-fat diet with saline or AB23A (2.55 mg/kg) daily for 12 weeks. **(A, B)** The TEM image of liver of ovariectomized ApoE<sup>-/-</sup> mice. Red arrow, lipid droplets. The original magnifications of the images in the same group are 1.2k× (left) and 5.0k× (right). **(C, D)** Western blot was used to detect the protein expression of LXRα, FXR, ABCG5, ABCG8 and CYP7A1 in the liver. p-values represent comparisons with controls. The results represent the mean ± SEM (n=3/group).
