# Supplementary material for: Alisol B 23-acetate activates ABCG5/G8 in the jejunum via the LXRα/ACAT2 pathway to relieve atherosclerosis in ovariectomized ApoE-/- mice
Source: Aging (Albany NY). 2020 Nov 25;12(24):25744–66. doi: 10.18632/aging.104185 (PMC7803561; doi:10.18632/aging.104185)
Supplement: Biochemical Indicators [file aging-12-104185-s002.xls]

## Sheet: Biochemical Indicator
S-Figure4
sf4-A-body weight
			Weeks	Control						AB23A
			0	16.3	17.4	16.9	16.6	17.9	17.5	17.3	17.2	17.1	16.9	16.9	17
			1	16.6	17.7	17.3	16.9	18.3	17.8	17.6	17.2	16.3	18.2	16.7	17.3
			2	20	21.1	19.6	21.3	19.6	20.2	19.9	19.5	20.6	19.5	19	18.6
			3	22.9	22.1	22.6	21.2	21.7	21.2	20.5	20.1	21.1	20.2	20.5	19.2
			4	23.6	23.9	23.4	21	22.6	22.1	21.2	21.8	22.8	22	21.2	21.9
			5	23.1	24.6	24	23.5	25.4	24.8	22.3	22.8	22.5	23.1	22	21.9
			6	24.3	25.9	25.2	24.8	26.7	26.1	23.9	23.8	22.5	23.2	23	22.9
			7	25.3	26.1	26.4	26.8	26	27.1	24	23.4	24.9	25	23.5	23.5
			8	26.9	27.7	26.9	27.1	28.6	26.9	24.5	23.8	25.4	25.5	24.9	25.6
			9	28.5	30.3	29.5	29	31.3	30.5	25.2	25.6	26	26.3	26.7	26.8
			10	29.3	31.3	30.5	29.9	32.2	31.5	26.9	26.6	26	27.4	27.7	27.3
			11	30.2	32.3	31.4	30.8	33.2	32.4	27.1	27.4	27.8	28.2	27.4	27.6
			12	31.5	31.6	31.7	31.1	32.6	32.8	28.2	28.5	28.8	28.4	27.5	28.7
sf4-B-liver weight
	liver weight(g)		2.3	2	12
			2.4	2.1
			2.3	2
			2.4	2.1
			2.5	2
			2.4	2.1
		P value		5.21628e-06
sf4-C-liver coeffients
	liver/weight		0.0730159	0.070922
			0.0759494	0.0736842
			0.0725552	0.0694444
			0.0771704	0.0739437
			0.0766871	0.0701754
			0.0731707	0.0731707
	percentage		7.30159	7.0922
			7.59494	7.36842
			7.25552	6.94444
			7.71704	7.39437
			7.66871	7.01754
			7.31707	7.31707
		P value		0.0328521
sf4-D-liver-ALT and AST
ALT					Control		AB23A
	standard curve line	0.002	0	OD	-0.143829	OD	-0.217
		31.283	28		-0.217		-0.217
		-0.217	57		7.15142		-0.217
		-0.217	97		7.17737		-0.217
		-0.217	150		7.10007		-0.217
		-0.217	200		-0.217		-0.217
					U/L			U/L
			ENZYMATIC activity		-108.994	ENZYMATIC activity		-157.884
					-157.884			-157.884
					4765.4			-157.884
					4782.74			-157.884
					4731.09			-157.884
					-157.884			-157.884
				P value				0.0481106
AST
		OD	U/L		Control		AB23A
	standard curve line	0.001	0	OD	0.247	OD	0.188
		0.071	24		0.225		0.176
		0.134	61		0.242		0.17
		0.184	114		0.2255		0.1895
		0.23	190		0.204		0.1895
					0.237		0.161
					U/L			U/L
			ENZYMATIC activity		176.27	ENZYMATIC activity		129.036
					158.657			119.429
					172.267			114.626
					159.058			130.237
					141.845			130.237
					168.264			107.421
				p value				7.9583e-05
sf4-E-liver-TG and TC
	Control	AB23A
	mmol/gprot	mmol/gprot
liver TG	0.383645	0.372851
	0.372458	0.353527
	0.368722	0.373094
	0.381279	0.362931
	0.392093	0.392793
	0.380275	0.354043
	0.383645	0.372851
	0.372458	0.353527
	0.368722	0.373094
	0.381279	0.362931
	0.392093	0.392793
	0.380275	0.354043
	p value	0.126642
	Control	AB23A
	mmol/gprot	mmol/gprot
liver TC	0.710748	0.623529
	0.648729	0.562656
	0.703524	0.6287
	0.704566	0.571552
	0.704186	0.592342
	0.687156	0.56766
	0.710748	0.623529
	0.648729	0.562656
	0.703524	0.6287
	0.704566	0.571552
	0.704186	0.592342
	0.687156	0.56766
p value		5.12017e-05
sf4-F-Fecal-TC
	Control	AB23A
	mmol/g	mmol/g
Fecal	7.75383	8.06693
	7.40223	8.55984
	7.22014	7.3788
	7.125	8.05003
	7.75319	8.01009
	6.97104	7.50622
	p value	0.0298058
sf4-G-liver-TBA
	Control	AB23A
	μmol/gprot	μmol/gprot
	1.41168	1.13891
	1.37373	0.973444
	1.42952	1.21614
	1.4274	1.13578
	1.44837	1.09279
	1.44128	1.17915
p value		8.61879e-06
sf4-H-Fecal-TBA
	Control	AB23A
	nmol/g	nmol/g
Fecal	1829.23	1779.55
	1720.81	1927.67
	2075.2	2139.66
	1755.99	2213.8
	1649.18	2126.47
	1881.76	2281.95
p value		0.0247636
S-Figure2
sf2-A-MTT-1
AB23A μM	Control	10000	1000	100	10	1
	96.1494	26.6044	46.6744	98.4831	98.4831	103.151
	98.9498	28.9382	45.741	87.748	99.4166	108.285
	96.1494	26.6044	43.874	113.419	106.184	111.552
	112.952	27.0712	43.874	101.75	108.285	112.952
	111.085	26.6044	42.9405	105.484	105.484	111.085
	98.4831	26.1377	44.3407	103.617	99.4166	98.4831
	97.0828	26.1377	42.007	89.1482	90.5484	97.0828
	89.1482	26.1377	35.0058	84.014	87.9813	89.1482
		26.6044	46.6744
		26.1377	45.741
		26.1377	43.874
		26.1377	43.874
		26.1377	42.9405
		26.1377	44.3407
		26.1377	42.007
		26.1377	35.0058
sf2-B-MTT-2
AB23A μM	Control	80	40	20
	101.149	96.1494	96.1494	118.149
	98.9498	96.9498	98.9498	98.9498
	96.1494	96.1494	96.1494	96.1494
	102.952	102.952	112.952	112.952
	111.085	111.085	102.085	111.085
	98.4831	95.4831	98.4831	98.4831
	97.0828	97.0828	96.0828	99.0828
	89.1482	89.1482	99.1482	95.1482
