# Supplementary material for: Alisol B 23-acetate activates ABCG5/G8 in the jejunum via the LXRα/ACAT2 pathway to relieve atherosclerosis in ovariectomized ApoE-/- mice
Source: Aging (Albany NY). 2020 Nov 25;12(24):25744–66. doi: 10.18632/aging.104185 (PMC7803561; doi:10.18632/aging.104185)
Supplement: IF data [file aging-12-104185-s003.xls]

## Sheet: IF data
f4-F-IF-ABCG5
	Control	AB23A
positive area	1.0478	1.5831
	1.1852	1.4567
	1.0567	1.5876
	1.1743	1.4575
	1.0279	1.6575
P		0.032
f4-G-IF-ABCG8
	Control	AB23A
positive area	1.2478	1.4732
	1.2852	1.4567
	1.3567	1.4876
	1.2743	1.38975
	1.3279	1.4575
P		0.045
S-Figure3
sf3-D-Caco-2-IF
		ABCG5					P	ABCG8					P	LXRα					P
1	positive area	15.2179	15.2608	16.2689	13.9133	14.4857		2.71793	2.26076	2.26893	1.91328	2.48572		8.16379	6.98227	6.90678	8.73985	7.95716
2		22.2179	24.2608	19.2689	19.9133	21.4857	0.000168407	5.21793	5.26076	6.26893	3.91328	4.48572	0.000202029	12.0012	12.0997	14.4185	13.0006	14.3172	2.5532e-05
3		25.2179	36.2608	26.2689	33.9133	34.4857	0.003897	5.41793	6.26076	4.26893	4.91328	3.48572	0.000877585	8.52151	7.53785	6.82657	7.97144	6.97144	0.707056
4		26.2179	35.2608	36.2689	32.1328	29.4857	0.00093978	5.61793	5.26076	6.16893	5.41328	4.48572	0.477145	14.0448	13.1519	12.4223	13.5332	14.2143	0.630937
