# Supplementary material for: Alisol B 23-acetate activates ABCG5/G8 in the jejunum via the LXRα/ACAT2 pathway to relieve atherosclerosis in ovariectomized ApoE-/- mice
Source: Aging (Albany NY). 2020 Nov 25;12(24):25744–66. doi: 10.18632/aging.104185 (PMC7803561; doi:10.18632/aging.104185)
Supplement: Lipidomics [file aging-12-104185-s004.xls]

## Sheet: Lipidomics
f2 C-I-Plasma lipidomics
Name	Control						AB23A
PC(18:1/18:1)	9.62571e+07	1.69064e+08	1.38873e+08	166753152	132262656	1.84302e+08	1.3476e+08	2.3669e+08	1.94422e+08	2.33454e+08	1.85168e+08	2.58023e+08
PC(20:0/18:1)	203681184	3.04585e+08	254695008	407455872	3.08881e+08	477556992	305521776	4.56878e+08	382042512	611183808	4.63321e+08	716335488
PC(20:2/20:2)	1.07745e+08	1.66257e+08	1.45988e+08	282382656	2.74416e+08	5.24492e+07	1.67005e+08	2.57699e+08	2.26281e+08	4.37693e+08	4.25346e+08	8.12963e+07
PC(18:0/22:5)	2.86225e+07	4.26734e+07	3.16945e+07	6.92406e+07	6.03706e+07	7.19887e+07	3.94991e+07	5.88894e+07	4.37384e+07	9.55521e+07	8.33114e+07	9.93444e+07
PI(16:0/18:1)	2.0697e+08	3.33618e+08	315108139	2.06612e+08	135460396	8.75289e+07	3.14595e+08	5.071e+08	4.78964e+08	3.1405e+08	2.059e+08	1.33044e+08
TAG(16:0/16:0/17:1)	9.35662e+06	19610271	3.95112e+07	1.26731e+07	9.64798e+06	4.10615e+06	5.8011e+06	1.21584e+07	2.44969e+07	7.8573e+06	5.98175e+06	2.54582e+06
TAG(16:0/16:1/18:2)	2.35972e+07	7.51459e+06	1.54963e+07	7.12369e+06	6.33859e+06	2.78508e+06	1.53382e+07	4.88448e+06	1.00726e+07	4.6304e+06	4.12008e+06	1.8103e+06
TAG(16:1/16:1/18:1)	32312466	5.39354e+07	1.10407e+08	4.3275e+07	41666778	2.02515e+07	2.10031e+07	3.5058e+07	7.17644e+07	2.81288e+07	2.70834e+07	1.31635e+07
TAG(14:0/18:2/18:2)	17095122	3.30906e+07	7.11988e+07	28268253	24784605	2.68573e+06	1.11118e+07	2.15089e+07	4.62792e+07	1.83744e+07	1.611e+07	1.74573e+06
TAG(15:0/18:1/18:2)	9.95501e+07	46932984	135917082	6.32618e+07	2.73492e+07	1.30671e+07	6.47075e+07	3.05064e+07	8.83461e+07	4.11202e+07	1.7777e+07	8.49364e+06
TAG(17:0/17:0/18:0)	8.76718e+07	8.25156e+07	2.34493e+08	7.47753e+07	56796678	2.86151e+07	5.78634e+07	5.44603e+07	154765569	4.93517e+07	3.74858e+07	1.88859e+07
TAG(16:0/18:1/18:2)	2.86821e+07	4.56738e+07	1.18379e+08	4.37271e+07	3.61435e+07	2.01764e+07	1.57752e+07	2.51206e+07	6.51086e+07	2.40499e+07	1.98789e+07	1.1097e+07
TAG(16:0/18:2/18:3)	2.13595e+07	1.94606e+07	4.0326e+07	159603552	2.3438e+07	1.63168e+07	1.38837e+07	1.26494e+07	2.62119e+07	1.03742e+08	1.52347e+07	1.06059e+07
TAG(17:1/18:2/18:2)	73599948	95736960	1.65357e+08	8.7861e+07	6.57725e+07	64633482	3.312e+07	43081632	7.44105e+07	3.95374e+07	2.95976e+07	2.90851e+07
TAG(16:0/18:1/20:2)	6.14497e+07	6.64632e+07	1.2322e+08	74775564	112754880	7.9961e+07	4.42438e+07	4.78535e+07	8.87184e+07	5.38384e+07	8.11835e+07	5.75719e+07
TAG(18:2/18:2/19:1)	9.39851e+07	8.87709e+07	2.24456e+08	137510262	70612686	8.44671e+07	6.10903e+07	5.77011e+07	145896206	8.93817e+07	4.58982e+07	5.49036e+07
TAG(18:1/18:1/20:0)	4.62091e+08	4.47196e+08	1367827776	9.02498e+08	3.69649e+08	4.46825e+08	2.07941e+08	2.01238e+08	6.15522e+08	4.06124e+08	1.66342e+08	2.01071e+08
CE 16:0	7.67144e+06	1.10946e+07	8.85498e+06	1.08437e+07	1.15481e+07	9.91205e+06	3.75901e+06	5.43635e+06	4.33894e+06	5.31342e+06	5.65856e+06	4.8569e+06
CE 16:1	4.89875e+06	7.14426e+06	5.71085e+06	6.96116e+06	7.34261e+06	6.13354e+06	3.42913e+06	5.00098e+06	3.9976e+06	4.87281e+06	5.13983e+06	4.29348e+06
CE 18:0	2.44938e+07	3.57213e+07	2.85543e+07	3.48058e+07	3.67131e+07	3.06677e+07	1.24918e+07	1.82179e+07	1.45627e+07	1.7751e+07	1.87237e+07	1.56405e+07
CE 18:1	1.9595e+07	2.8577e+07	2.28434e+07	2.78446e+07	2.93704e+07	2.45342e+07	1.07773e+07	1.57174e+07	1.25639e+07	1.53146e+07	1.61537e+07	1.34938e+07
CE 20:0	1.46963e+07	2.14328e+07	1.71326e+07	2.08835e+07	2.20278e+07	1.84006e+07	6.61332e+06	9.64475e+06	7.70965e+06	9.39757e+06	9.91253e+06	8.28028e+06
CE 22:0	5.37001e+06	7.76622e+06	6.19848e+06	7.59059e+06	8.08366e+06	6.93843e+06	2.685e+06	3.88311e+06	3.09924e+06	3.7953e+06	4.04183e+06	3.46922e+06
Normalized
Name	Control					AB23A
PC(18:1/18:1)	0.650743	1.14295	0.938847	1.12733	0.894158	1.24597	0.911041	1.60013	1.31439	1.57826	1.25182	1.74436
PC(20:0/18:1)	0.624516	0.933903	0.780932	1.24932	0.947073	1.46426	0.936774	1.40085	1.1714	1.87398	1.42061	2.19639
PC(20:2/20:2)	0.628107	0.969205	0.851044	1.64616	1.59972	0.305755	0.973566	1.50227	1.31912	2.55155	2.47957	0.473921
PC(18:0/22:5)	0.563823	0.840607	0.624336	1.36394	1.18921	1.41808	0.778076	1.16004	0.861584	1.88224	1.64112	1.95694
PI(16:0/18:1)	0.966175	1.55739	1.47098	0.964501	0.632353	0.4086	1.46859	2.36723	2.23589	1.46604	0.961177	0.621073
TAG(16:0/16:0/17:1)	0.591534	1.23978	2.49793	0.801203	0.609954	0.259595	0.366751	0.768664	1.54872	0.496746	0.378172	0.160949
TAG(16:0/16:1/18:2)	2.25252	0.717321	1.47923	0.680007	0.605063	0.265855	1.46414	0.466259	0.961501	0.442004	0.393291	0.172806
TAG(16:1/16:1/18:1)	0.642293	1.0721	2.19462	0.860202	0.828234	0.402551	0.41749	0.696867	1.4265	0.559131	0.538352	0.261658
TAG(14:0/18:2/18:2)	0.579093	1.12094	2.41184	0.95758	0.839572	0.0909785	0.37641	0.728608	1.5677	0.622427	0.545722	0.059136
TAG(15:0/18:1/18:2)	1.5471	0.72938	2.11227	0.983145	0.425031	0.203075	1.00561	0.474097	1.37298	0.639044	0.27627	0.131999
TAG(17:0/17:0/18:0)	0.931246	0.876477	2.49078	0.79426	0.603292	0.303948	0.614622	0.578475	1.64391	0.524211	0.398173	0.200606
TAG(16:0/18:1/18:2)	0.587784	0.935995	2.42595	0.896102	0.740691	0.413475	0.323281	0.514797	1.33427	0.492856	0.40738	0.227412
TAG(16:0/18:2/18:3)	0.45688	0.416263	0.862574	3.41393	0.501339	0.349017	0.296972	0.270571	0.560673	2.21905	0.32587	0.226861
TAG(17:1/18:2/18:2)	0.79861	1.03881	1.79423	0.953352	0.713677	0.701318	0.359374	0.467465	0.807405	0.429008	0.321154	0.315593
TAG(16:0/18:1/20:2)	0.710916	0.768917	1.42554	0.865084	1.30447	0.925074	0.51186	0.55362	1.02639	0.62286	0.939218	0.666053
TAG(18:2/18:2/19:1)	0.805814	0.761109	1.92445	1.17899	0.605423	0.724209	0.523779	0.494721	1.25089	0.766346	0.393525	0.470736
TAG(18:1/18:1/20:0)	0.693815	0.671451	2.05375	1.35507	0.555016	0.670894	0.312217	0.302153	0.924188	0.609783	0.249757	0.301902
CE 16:0	0.768106	1.11085	0.886608	1.08573	1.15626	0.992448	0.376372	0.544317	0.434438	0.532008	0.566566	0.486299
CE 16:1	0.769615	1.12239	0.8972	1.09363	1.15356	0.963606	0.538731	0.785676	0.62804	0.76554	0.80749	0.674524
CE 18:0	0.769615	1.12239	0.8972	1.09363	1.15356	0.963606	0.392504	0.572421	0.457572	0.557751	0.588314	0.491439
CE 18:1	0.769615	1.12239	0.8972	1.09363	1.15356	0.963606	0.423288	0.617317	0.49346	0.601496	0.634456	0.529983
CE 20:0	0.769615	1.12239	0.8972	1.09363	1.15356	0.963606	0.346327	0.505077	0.40374	0.492133	0.5191	0.433623
CE 22:0	0.768106	1.11085	0.886608	1.08573	1.15626	0.992448	0.384053	0.555426	0.443304	0.542865	0.578128	0.496224
f3 G-M-jejunum lipidomics
Name	Control					AB23A
PI(16:0/18:1)	290709152	8763052	267464192	247920208	12433960	3.77922e+08	1.1392e+07	3.47703e+08	3.22296e+08	16164148
PI(16:0/18:2)	478225920	494925632	501996544	422073376	351027968	717338880	742388448	752994816	633110064	526541952
PC(20:0/18:1)	151141856	179600128	159459680	140242672	91671352	188927320	224500160	199324600	175303340	114589190
FA 21:5	847844608	15648733	905584896	692046080	29328134	9.32629e+08	1.72136e+07	9.96143e+08	761250688	3.22609e+07
FA 21:3	127159560	1833673	104214320	97785496	4823360	139875516	2.01704e+06	114635752	1.07564e+08	5305696
FA 18:2	21727120	1218512	7676431	10553215	4492338	22813476	1.27944e+06	8.06025e+06	1.10809e+07	4.71695e+06
FA 18:1	34653040	287386	11743865	15757568	4417496	50246908	416710	1.70286e+07	2.28485e+07	6.40537e+06
FA 16:1	89413944	2512385	37300096	51058456	8761828	1.43062e+08	4019816	5.96802e+07	8.16935e+07	1.40189e+07
FA 16:0	50231502	3552044	19358462	7647550	12880321	7.23334e+07	5.11494e+06	2.78762e+07	11012472	1.85477e+07
TAG(16:0/16:0/17:1)	64927528	1476852	11456389	25001400	8440276	3.63594e+07	827037	6.41558e+06	14000784	4.72655e+06
TAG(16:0/16:1/18:2)	64927528	1681293	15950593	31749124	10829741	3.63594e+07	941524	8.93233e+06	1.77795e+07	6.06465e+06
TAG(16:1/16:1/18:1)	7.7913e+07	2.01755e+06	1.91407e+07	3.80989e+07	1.29957e+07	6.23304e+07	1.61404e+06	1.53126e+07	3.04792e+07	1.03966e+07
TAG(16:0/18:1/20:2)	5.06435e+07	1.31141e+06	1.24415e+07	2.47643e+07	8.4472e+06	2.83603e+07	734389	6.96722e+06	1.3868e+07	4.73043e+06
TAG(18:2/18:2/19:1)	5.31756e+07	1.37698e+06	1.30635e+07	2.60025e+07	8.86956e+06	2.97784e+07	771108	7.31558e+06	1.45614e+07	4.96695e+06
TAG(18:1/18:1/20:0)	5.68979e+07	1.47337e+06	1.3978e+07	2.78227e+07	9.49043e+06	3.12939e+07	810352	7.68789e+06	1.53025e+07	5.21973e+06
CE 16:1	2.44938e+06	3.57213e+06	2.85543e+06	3.48058e+06	3.67131e+06	1.71456e+06	2.50049e+06	1.9988e+06	2.43641e+06	2.56991e+06
CE 18:1	8.81775e+06	1.28597e+07	1.02795e+07	1.25301e+07	1.32167e+07	4.84976e+06	7.07281e+06	5.65374e+06	6.89155e+06	7.26919e+06
CE 18:2	1.76355e+06	2.57193e+06	2.05591e+06	2.50602e+06	2.64334e+06	969953	1.41456e+06	1.13075e+06	1.37831e+06	1.45384e+06
Normalized
Name	Control					AB23A
PI(16:0/18:1)	1.757	0.0529624	1.61651	1.49839	0.0751487	2.28409	0.0688511	2.10146	1.9479	0.0976933
PI(16:0/18:2)	1.06355	1.10069	1.11642	0.938671	0.78067	1.59533	1.65104	1.67462	1.40801	1.171
PC(20:0/18:1)	1.04652	1.24357	1.10411	0.971054	0.634741	1.30815	1.55446	1.38014	1.21382	0.793427
FA 21:5	1.70219	0.0314174	1.81811	1.3894	0.0588811	1.87241	0.0345592	1.99992	1.52834	0.0647692
FA 21:3	1.89329	0.0273017	1.55166	1.45594	0.0718154	2.08262	0.0300319	1.70682	1.60153	0.078997
FA 18:2	2.37883	0.133411	0.840468	1.15544	0.491852	2.49777	0.140081	0.882491	1.21321	0.516444
FA 18:1	2.59149	0.0214918	0.878251	1.17841	0.330357	3.75766	0.0311632	1.27346	1.7087	0.479018
FA 16:1	2.36486	0.0664488	0.986531	1.35042	0.231737	3.78378	0.106318	1.57845	2.16067	0.370779
FA 16:0	2.6813	0.189604	1.03333	0.408218	0.687538	3.86108	0.27303	1.488	0.587834	0.990055
TAG(16:0/16:0/17:1)	2.91672	0.0663441	0.514651	1.12313	0.37916	1.63336	0.0371527	0.288205	0.628952	0.212329
TAG(16:0/16:1/18:2)	2.59423	0.0671774	0.637319	1.26856	0.432711	1.45277	0.0376193	0.356898	0.710395	0.242318
TAG(16:1/16:1/18:1)	2.59423	0.0671774	0.637319	1.26856	0.432711	2.07539	0.0537419	0.509855	1.01485	0.346169
TAG(16:0/18:1/20:2)	2.59423	0.0671774	0.637319	1.26856	0.432711	1.45277	0.0376193	0.356898	0.710395	0.242318
TAG(18:2/18:2/19:1)	2.59423	0.0671774	0.637319	1.26856	0.432711	1.45277	0.0376193	0.356898	0.710395	0.242318
TAG(18:1/18:1/20:0)	2.59423	0.0671774	0.637319	1.26856	0.432711	1.42683	0.0369476	0.350525	0.697709	0.237991
CE 16:1	0.764054	1.11428	0.890716	1.08573	1.14522	0.534838	0.779998	0.623501	0.760008	0.801654
CE 18:1	0.764054	1.11428	0.890716	1.08573	1.14522	0.42023	0.612856	0.489894	0.597149	0.629871
CE 18:2	0.764054	1.11428	0.890716	1.08573	1.14522	0.42023	0.612856	0.489894	0.597149	0.629871
