# Supplementary material for: Alisol B 23-acetate activates ABCG5/G8 in the jejunum via the LXRα/ACAT2 pathway to relieve atherosclerosis in ovariectomized ApoE-/- mice
Source: Aging (Albany NY). 2020 Nov 25;12(24):25744–66. doi: 10.18632/aging.104185 (PMC7803561; doi:10.18632/aging.104185)
Supplement: Lipids level (TC TG HDL LDL) [file aging-12-104185-s005.xlsx]

## Sheet: lipids levels
Figure2
f2 A-Plama-lipids levels
mmol/L	Control					AB23A					p
TC	39.4819	38.2791	39.8618	39.1654	38.469	30.2392	28.1501	28.9098	29.0997	28.9731	1.79189e-08
TG	4.75874	4.52	4.35289	4.60356	4.46032	2.75338	2.95631	2.80113	2.59821	2.5624	8.39415e-08
LDL-c	24.5762	24.4769	25.0723	24.4769	25.0723	20.64	16.77	17.8285	16.8692	16.0092	2.41986e-05
HDL-c	2.535	2.235	2.32071	2.25643	2.385	10.14	8.94	9.28286	9.02571	9.54	1.08304e-09
f2-B-Plam-non-HDL-c levels	Control					AB23A
non-HDL-c	36.9469	36.0441	37.5411	36.909	36.084	20.0992	19.2101	19.627	20.074	19.4331
	Control	AB23A	p
non-HDL-c	36.9469	20.0992	2.46459e-11
	36.0441	19.2101
	37.5411	19.627
	36.909	20.074
	36.084	19.4331
Figure5
f5-C-Total TAG in Caco-2 cells
AB23A μM	0	20	40	80
mmol/gprot	567	480	450	400
	545	460	440	410
	550	455	420	415
	578	450	425	405
	525	460	427	421
f5-D-Total cholesterol in Caco-2 cells
AB23A μM	0	20	40	80
mmol/gprot	650	600	480	390
	645	570	505	395
	640	550	500	410
	642	567	450	405
	630	545	470	402
f5-E-Free cholesterol in Caco-2 cells
AB23A μM	0	20	40	80
mmol/gprot	450	264	230	180
	465	295	250	170
	490	285	245	193
	440	269	215	185
	435	280	225	160
