# Supplementary material for: Alisol B 23-acetate activates ABCG5/G8 in the jejunum via the LXRα/ACAT2 pathway to relieve atherosclerosis in ovariectomized ApoE-/- mice
Source: Aging (Albany NY). 2020 Nov 25;12(24):25744–66. doi: 10.18632/aging.104185 (PMC7803561; doi:10.18632/aging.104185)
Supplement: Oil red data [file aging-12-104185-s006.xlsx]

## Sheet: oil red data
Figure1
f1 C-Aortic root-oil red
positive staining area(%)	Control	AB23A
	15	6
	17	9
	14.55	8
	15.7	6
	13.8	6.5
P		8.38644e-06
Figure3
f3 E-Jejunum-oil red	Control	AB23A
positive staining area(%)	5.8	5.6
	6.9	3.4
	7.7	5.6
	6.9	5.9
	7.9	6.2
		0.0254852
Figure5
f5-B-Caco-2-oil red
AB23A μM	0	20	40	80
	12.2325	10.191	8.07357	7.83136
	14.1803	10.4863	8.36528	7.90709
	14.0901	9.867	7.83857	7.6818
	13.1612	9.10322	7.55564	7.40452
	13.451	9.99313	8.27548	8.10997
P		0.031	0.009	3.64474e-07
Figure6
f6-H-Caco-2-oil red	1	2	3	4
	15.2179	11.3691	20.1458	21.2596
	15.2608	10.2616	22.4562	22.1081
	16.2689	10.4479	23.5322	25.9435
	13.9133	10.2439	23.2458	22.1915
	14.4857	10.1855	21.0345	23.4133
P		0.001	0.001	4.35378e-07
