# Supplementary material for: Alisol B 23-acetate activates ABCG5/G8 in the jejunum via the LXRα/ACAT2 pathway to relieve atherosclerosis in ovariectomized ApoE-/- mice
Source: Aging (Albany NY). 2020 Nov 25;12(24):25744–66. doi: 10.18632/aging.104185 (PMC7803561; doi:10.18632/aging.104185)
Supplement: WB and RT-PCR data [file aging-12-104185-s007.xlsx]

## Sheet: WB and PCR data
Figure4
f4-A-jejunum-pcr	Control			AB23A			P
NPC1L1	1.06044	1.00295	0.874381	0.929253	0.928634	1.02421	0.784658
ABGG5	1.0613	0.968536	1.00287	1.11711	1.20386	1.17973	0.0140665
ABCG8	0.96357	1.02828	1.17119	1.42661	1.40456	1.38182	0.00504674
ABCA1	1.01865	0.988021	1.08718	1.1601	0.930584	0.938318	0.802191
ACAT2	1.02752	0.980393	0.980015	0.844309	0.838174	0.776886	0.00272659
MTP	0.989334	0.973941	1.02728	0.966045	0.972482	0.935116	0.117699
SREBP	0.980454	0.965199	1.01806	1.02908	1.03567	1.01065	0.0991007
HMGCR	0.654433	1.05954	0.836327	1.12966	0.996279	1.10943	0.140011
LXRα	1.05563	1.0421	0.989982	1.21446	1.495	1.67822	0.0335858
f4-C-jejunum-WB	Control			AB23A			P
LXRα	0.945	1.055	0.937	1.2	1.46	1.33	0.0140233
ACAT2	1.15	0.95	1.1	0.78	0.82	0.75	0.011096
ABGG5	0.855	1.145	0.9	1.23	1.29	1.26	0.0330004
ABCG8	0.862	1.138	0.9	1.23	1.29	1.26	0.0291033
Figure6
f6-B-Caco-2-WB
AB23A μM	ABCG5			P		ABCG8			P		ACAT2			P
0	0.92	1.05	1.01			0.95	1.02	1.03			0.95	1.01	1.04
20	1.18	1.08	1.23	0.0438537		1.11	1.14	1.09	0.342127		0.93	0.95	0.92	0.0751305
40	1.45	1.35	1.42	0.0101802		1.21	1.25	1.24	0.00561189		0.75	0.72	0.69	0.000898386
80	1.65	1.48	1.59	0.0451412		1.25	1.25	1.29	0.00384559		0.65	0.61	0.59	0.000271505
f6-C-Caco-2-pcr
AB23A μM	ABCG5			P		ABCG8			P		ACAT2			P
0	1	1	1			1	1	1			1	1	1
20	1.68	1.48	1.63	0.000577689		1.61	1.54	1.44	0.00042538		0.91	1.07	0.92	0.554552
40	1.85	1.95	1.62	0.0011737		1.61	1.85	1.82	0.000547774		0.71	0.65	0.61	0.000293743
80	2.25	2.38	2.59	0.0125194		1.95	2.25	2.39	0.00863846		0.55	0.6	0.59	1.04061e-05
f6-E-Caco-2-WB
	ABCG5			P			ABCG8			P			LXRα			P			ACAT2			P
1	1	0.95	1.05			1	0.88	1.1	1.02			1	1.13	0.87	1			1	0.96	0.89	1.07
2	1.65	1.48	1.59	0.000569973		2	1.25	1.35	1.29	0.0136425		2	1.4	1.56	1.47	0.0056737		2	0.65	0.59	0.57	0.00302701
3	0.5	0.56	0.62	7.51646e-05		3	0.68	0.63	0.65	3.83726e-05		3	0.56	0.5	0.54	4.48583e-05		3	1.24	1.34	1.19	0.014403
4	0.52	0.6	0.64	8.55232e-05		4	0.72	0.69	0.73	4.97063e-05		4	0.62	0.57	0.6	5.44066e-05		4	1.26	1.32	1.2	0.0103044
f6-F-Caco-2-pcr
	ABCG5			P			ABCG8			P			LXRα			P			ACAT2			P
1	1	1	1			1	1	1	1			1	1	1	1			1	1	1	1
2	2.05	1.95	1.85	7.98722e-05		2	1.75	1.85	1.79	1.0528e-05		2	2.15	1.95	2.05	5.37586e-05		2	0.62	0.59	0.57	9.69465e-06
3	0.52	0.55	0.62	2.83623e-05		3	0.58	0.53	0.65	1.17169e-05		3	0.56	0.5	0.54	1.49032e-05		3	1.64	1.74	1.59	0.000118418
4	0.54	0.61	0.64	3.1239e-05		4	0.72	0.59	0.63	1.82852e-05		4	0.62	0.57	0.55	0.16237		4	1.56	1.72	1.6	0.000199893
Figure7
f7-B-Caco-2-WB
	ABCG5			P		ABCG8			P		LXRα			P		ACAT2			P
1	1.12	0.88	1			0.88	1.1	1.02			1.16	0.84	1			1.12	0.88	1
2	1.55	1.48	1.59	0.00211155		1.28	1.32	1.25	0.013663		1.42	1.52	1.58	0.00806953		0.82	0.76	0.74	0.0365421
3	1.65	1.56	1.62	0.167989		1.34	1.42	1.39	0.0318248		1.06	1.05	0.9	0.00194831		0.55	0.52	0.59	0.00219685
4	1.68	1.69	1.58	0.0819907		1.39	1.45	1.44	0.00645164		1.46	1.55	1.58	0.712549		0.5	0.54	0.53	0.000743011
f7-C-Caco-2-pcr
	ABCG5			P		ABCG8			P		LXRα			P		ACAT2			P
1	1	1	1			1	1	1			1	1	1			1	1	1
2	2.05	1.95	1.95	7.86219e-06		1.78	1.85	1.8	2.60583e-06		2.05	1.95	2.12	2.99182e-05		0.72	0.76	0.74	2.30381e-05
3	2.32	2.25	2.22	1.80825e-06		2.08	1.93	2.15	8.42891e-05		1.02	1.12	0.95	0.575919		0.45	0.51	0.49	8.08674e-06
4	2.44	2.21	2.24	0.01695		2.12	1.98	2.17	0.00985111		2.1	1.89	2.15	0.946689		0.46	0.52	0.47	0.000300894
f7-E-Caco-2-WB
	ABCG5			P		ABCG8			P		LXRα			P		ACAT2			P
	1.13	0.87	1			0.88	1.11	1.01			1.15	0.85	1			1.1	0.9	1
	1.51	1.49	1.55	0.00258024		1.35	1.31	1.35	0.00771767		1.45	1.52	1.58	0.00542269		0.8	0.76	0.74	0.0180686
	1.62	1.55	1.58	0.0681604		1.33	1.42	1.41	0.00592795		1.12	0.95	1.05	0.0015399		0.55	0.52	0.45	0.00165677
	1.74	1.73	1.63	0.00955358		1.48	1.45	1.47	0.00124391		1.47	1.55	1.59	0.717706		0.52	0.42	0.43	0.0010387
f7-F-Caco-2-pcr
	ABCG5			P		ABCG8			P		LXRα			P		ACAT2			P
	1	1	1			1	1	1			1	1	1			1	1	1
	2.05	1.95	1.95	7.86219e-06		1.78	1.85	1.8	2.60583e-06		1.98	1.95	2.14	6.47339e-05		0.72	0.76	0.74	2.30381e-05
	2.36	2.27	2.22	6.1847e-06		2.08	1.93	2.15	8.42891e-05		1.06	1.05	0.98	0.299118		0.4	0.47	0.49	3.66224e-05
	2.47	2.22	2.32	0.0115064		2.15	2.18	2.08	0.000836083		1.95	1.91	2.18	0.927144		0.41	0.43	0.45	4.53576e-05
sf2-D-Caco-2-WB
AB23A μM	ABCA1			P		ABCG1			P		CYP7A1			P		NPC1L1			P
0	0.89	1.1	1.01			0.95	0.98	1.07			1.02	1.1	0.88			0.92	1	1.08
20	1.02	1.04	0.96	0.923718		1.04	1.1	0.89	0.896408		0.98	0.95	0.89	0.436793		1.05	0.92	1.08	0.816898
40	1.1	0.95	1.05	0.680218		0.95	1.1	1.01	0.741521		0.88	0.78	0.85	0.0822742		0.98	1.13	1.09	0.358904
80	1.03	1.11	1.12	0.266464		1.15	1.01	0.87	0.915485		0.78	0.74	0.69	0.0191613		1.02	0.99	1.15	0.473125
sf2-F-Caco-2-WB
	ABCG5			ABCG8			ACAT2			LXRα			FXR
1	0.96	1.04	1	1.1	1	0.9	1.05	1.02	0.93	0.97	1.1	0.93	1.12	0.89	1.01
2	1.46	1.55	1.49	1.25	1.19	1.32	0.65	0.55	0.62	1.54	1.51	1.47	1.25	1.2	1.35
3	0.98	1.01	1.05	0.95	1.12	0.98	0.95	1.02	0.98	0.89	1.05	0.95	0.61	0.55	0.53
4	1.45	1.52	1.51	1.22	1.21	1.26	0.61	0.59	0.64	1.48	1.45	1.52	0.65	0.71	0.65
S-Figure5
sf5-D-liver-WB
	Control			AB23A			P
LXR	0.96	0.89	1.14	1.23	1.34	1.18	0.0453529
FXR	1.1	0.88	1.02	1.35	1.42	1.36	0.00516704
ABCG5	0.95	1.05	1	1.29	1.25	1.19	0.00402647
ABCG8	1.1	1	0.9	1.15	1.2	1.17	0.0436152
CYP7A1	0.97	1.08	0.95	0.78	0.85	0.81	0.0145131
